# Supplementary material for: Selective catalytic oxidation of benzene to phenol by a vanadium oxide nanorod (Vnr) catalyst in CH3CN using H2O2(aq)and pyrazine-2-carboxylic acid (PCA)
Source: Royal Society of Chemistry journal article supplement (doi:10.1039/c9nj02514f), 2019-01-01
Supplement: c9nj02514f1.pdf [file c9nj02514f1.pdf]

## Electronic Supplementary Information (ESI<sup>†</sup>)

### Selective catalytic oxidation of benzene to phenol by a vanadium oxide (V<sub>nr</sub>) nanorod catalyst in CH<sub>3</sub>CN using H<sub>2</sub>O<sub>2(aq)</sub> and pyrazine-2-carboxylic acid (PCA)

Wondemagegn Hailemichael Wanna,<sup>a,b</sup> Damodar Janmanchi,<sup>a</sup> Natarajan Thiyagarajan,<sup>a</sup> Ravirala Ramu,<sup>a,c</sup> Yi-Fang Tsai,<sup>a</sup> Chih-Wen Pao,<sup>d</sup> and Steve S.-F. Yu<sup>a,b,\*</sup>

From <sup>a</sup>Institute of Chemistry, Academia Sinica, Taipei 11529, Taiwan

<sup>b</sup>Sustainable Chemical Science and Technology, Taiwan International Graduate Program (TIGP), National Chiao-Tung University and Academia Sinica, Taiwan

<sup>c</sup>Sree Dattha Institute of Engineering & Science, Hyderabad, Telangana, India-501510

<sup>d</sup>National Synchrotron Radiation Research Center (NSRRC), Hsinchu 30076, Taiwan

\*corresponding author:

E-mail address: [sfyu@gate.sinica.edu.tw](mailto:sfyu@gate.sinica.edu.tw)

**Table S1.** Oxidation of benzene to *p*-benzoquinone (*p*-BQ) and phenol (PhOH) catalyzed by the various vanadium catalysts.<sup>[a]</sup>

| Catalyst                            | TON <sup>[b]</sup> |       | Total TON <sup>[c]</sup> | Y <sub>S</sub> [%] <sup>[d]</sup> | Y <sub>O</sub> [%] <sup>[e]</sup> | OCE [%] <sup>[f]</sup> | PhOH [%] <sup>[g]</sup> | H <sub>2</sub> O <sub>2</sub> (%) remained |
|-------------------------------------|--------------------|-------|--------------------------|-----------------------------------|-----------------------------------|------------------------|-------------------------|--------------------------------------------|
|                                     | <i>p</i> -BQ       | PhOH  |                          |                                   |                                   |                        |                         |                                            |
| V <sub>nr</sub>                     | 1.75               | 11.74 | 13.49                    | 4.21                              | 7.03                              | 12.10                  | 87.03                   | 25                                         |
| V <sub>nr</sub> (PCA)               | 1.30               | 25.54 | 26.83                    | 8.37                              | 13.99                             | 63.93                  | 95.17                   | 77                                         |
| V <sub>2</sub> O <sub>5</sub>       | 0.18               | 5.19  | 5.37                     | 1.68                              | 2.80                              | 4.91                   | 96.62                   | 41                                         |
| V <sub>2</sub> O <sub>5</sub> (PCA) | 0.55               | 9.58  | 10.13                    | 3.16                              | 5.28                              | 8.97                   | 94.59                   | 38                                         |
| VOSO <sub>4</sub>                   | 0.78               | 8.38  | 9.16                     | 2.86                              | 4.78                              | 6.50                   | 91.46                   | 20                                         |
| VOSO <sub>4</sub> (PCA)             | 0.58               | 9.11  | 9.70                     | 3.03                              | 5.06                              | 7.56                   | 94.00                   | 29                                         |
| VCl <sub>3</sub>                    | 0.68               | 6.12  | 6.80                     | 2.12                              | 3.55                              | 13.13                  | 89.98                   | 70                                         |
| VCl <sub>3</sub> (PCA)              | 0.48               | 6.93  | 7.41                     | 2.31                              | 3.86                              | 12.14                  | 93.50                   | 66                                         |

<sup>[a]</sup>Conditions: Total volume of the reaction solution was 3 mL; Solvent: acetonitrile; Catalyst: V<sub>nr</sub>/V<sub>2</sub>O<sub>5</sub>/VOSO<sub>4</sub>/VCl<sub>3</sub> (0.014 mmol); Substrate: benzene (4.486 mmol); Oxidant: 35% H<sub>2</sub>O<sub>2</sub>(aq) (2.685 mmol); PCA (0.04 mmol); Temperature: 25 °C; Time: 5 h. Product quantification was conducted by GC analysis with nitrobenzene as the internal standard. <sup>[b]</sup>Turnover number (TON) for each of the oxygenated products, *p*-BQ and PhOH (mmol), respectively, was determined by calculating the number of millimoles of product per millimole of catalyst (based on V content). <sup>[c]</sup>The total TON of the products (*p*-BQ + PhOH). <sup>[d]</sup>Y<sub>S</sub> [%]<sub>c</sub> = [substrate (mol)/H<sub>2</sub>O<sub>2</sub> (mol)]×100. <sup>[e]</sup>Y<sub>O</sub> [%]<sub>c</sub> = [products (mol)/H<sub>2</sub>O<sub>2</sub> (mol)]×100. <sup>[f]</sup>Overall catalytic efficiency (OCE) = (2×*p*-BQ + PhOH)[TON]/[H<sub>2</sub>O<sub>2</sub> consumed (equiv.)]. <sup>[g]</sup>Selectivity of PhOH = [(PhOH) (mol)/ [*p*-BQ + PhOH] (mol)]×100.

**Table S2.** Oxidation of benzene to *p*-benzoquinone (*p*-BQ) and phenol (PhOH) catalyzed by the vanadium oxide nanorod catalyst ( $V_{nr}$ ) using various  $H_2O_{2(aq)}$  concentrations.<sup>[a]</sup>

| 35% $H_2O_2$<br>(mmol) | TON <sup>[b]</sup> |       | Total<br>TON <sup>[c]</sup> | $Y_S$<br>[%] <sup>[d]</sup> | $Y_O$<br>[%] <sup>[e]</sup> | OCE<br>[%] <sup>[f]</sup> | PhOH<br>[%] <sup>[g]</sup> | $H_2O_2$ (%)<br>remained |
|------------------------|--------------------|-------|-----------------------------|-----------------------------|-----------------------------|---------------------------|----------------------------|--------------------------|
|                        | <i>p</i> -BQ       | PhOH  |                             |                             |                             |                           |                            |                          |
| 0.31                   | 0.06               | 2.34  | 2.40                        | 0.75                        | 10.85                       | 13.69                     | 97.42                      | 18                       |
| 0.67                   | 0.08               | 13.14 | 13.22                       | 4.12                        | 27.62                       | 37.98                     | 99.43                      | 27                       |
| 1.34                   | 0.09               | 16.99 | 17.09                       | 5.33                        | 17.85                       | 31.23                     | 99.46                      | 42                       |
| 2.68                   | 1.30               | 25.54 | 26.83                       | 8.37                        | 13.99                       | 63.93                     | 95.17                      | 77                       |
| 4.64                   | 0.21               | 6.71  | 6.92                        | 2.16                        | 2.09                        | 10.35                     | 96.90                      | 79                       |
| 9.28                   | 0.13               | 8.26  | 8.38                        | 2.62                        | 1.26                        | 10.77                     | 98.47                      | 88                       |

<sup>[a]</sup>Conditions: Total volume of the reaction solution was 3 mL, Solvent: acetonitrile; Catalyst:  $V_{nr}$  (V content: 0.014 mmol), Substrate: benzene (4.486 mmol); PCA (0.04 mmol), Temperature: 25 °C; Time: 5 h. Product quantification was conducted by GC analysis with nitrobenzene as the internal standard; <sup>[b]</sup>Turnover number (TON) for each of the oxygenated products, *p*-BQ and PhOH (mmol), respectively, was determined by calculating the number of millimoles of product per millimole of catalyst (based on V content). <sup>[c]</sup>The total TON of the products (*p*-BQ + PhOH). <sup>[d]</sup> $Y_S$  [%]<sub>c</sub> = [substrate (mol)/ $H_2O_2$  (mol)] $\times$ 100. <sup>[e]</sup> $Y_O$  [%]<sub>c</sub> = [products (mol)/ $H_2O_2$  (mol)] $\times$ 100. <sup>[f]</sup>Overall catalytic efficiency (OCE) = (2 $\times$ *p*-BQ + PhOH)[TON]/[ $H_2O_2$  consumed]. <sup>[g]</sup>Selectivity of PhOH = [(PhOH) (mol)/ [*p*-BQ + PhOH] (mol)] $\times$ 100. (equiv.)

**Table S3.** Oxidation of benzene to *p*-benzoquinone (*p*-BQ) and phenol (PhOH) catalyzed by the vanadium oxide nanorod catalyst ( $V_{nr}$ ) using various  $H_2O_{2(aq)}$  percentages.<sup>[a]</sup>

| % $H_2O_2$ | TON <sup>[b]</sup> |       | Total<br>TON <sup>[c]</sup> | $Y_S$<br>[%] <sup>[d]</sup> | $Y_O$<br>[%] <sup>[e]</sup> | OCE<br>[%] <sup>[f]</sup> | PhOH<br>[%] <sup>[g]</sup> | $H_2O_2$ (%)<br>remained |
|------------|--------------------|-------|-----------------------------|-----------------------------|-----------------------------|---------------------------|----------------------------|--------------------------|
|            | <i>p</i> -BQ       | PhOH  |                             |                             |                             |                           |                            |                          |
| 5          | 0.09               | 3.32  | 3.42                        | 1.07                        | 12.45                       | 25.07                     | 97.26                      | 49                       |
| 10         | 0.16               | 7.03  | 7.19                        | 2.24                        | 13.13                       | 28.29                     | 97.73                      | 52                       |
| 20         | 0.23               | 10.81 | 11.04                       | 3.45                        | 10.08                       | 28.92                     | 97.88                      | 64                       |
| 35         | 1.30               | 25.54 | 26.83                       | 8.37                        | 13.99                       | 63.93                     | 95.17                      | 77                       |

<sup>[a]</sup>Conditions: Total volume of the reaction solution was 3 mL; Solvent: acetonitrile; Catalyst:  $V_{nr}$  (V content: 0.014 mmol), Substrate: benzene (4.486 mmol);  $H_2O_{2(aq)}$  (260  $\mu$ L); PCA (0.04 mmol); Temperature: 25 °C; Time: 5 h. The products were determined using GC analysis with nitrobenzene as the internal standard. <sup>[b]</sup>Turnover number (TON) for each of the oxygenated products, *p*-BQ and PhOH (mmol), respectively, was determined by calculating the number of millimoles of product per millimole of catalyst (based on V content). <sup>[c]</sup>The total TON of the products (*p*-BQ + PhOH). <sup>[d]</sup> $Y_S$  [%]<sub>c</sub> = [substrate (mol)/ $H_2O_2$  (mol)] $\times$ 100. <sup>[e]</sup> $Y_O$  [%]<sub>c</sub> = [products (mol)/ $H_2O_2$  (mol)] $\times$ 100. <sup>[f]</sup>Overall catalytic efficiency (OCE) = (2 $\times$ *p*-BQ + PhOH)[TON]/[ $H_2O_2$  consumed (equiv.)]. <sup>[g]</sup>Selectivity of PhOH = [(PhOH) (mol)/ [*p*-BQ + PhOH] (mol)] $\times$ 100.

**Table S4.** Oxidation of benzene to *p*-benzoquinone (*p*-BQ) and phenol (PhOH) catalyzed by the vanadium oxide nanorod catalyst ( $V_{nr}$ ) in presence of PCA.<sup>[a]</sup>

| Time (h) | TON <sup>[b]</sup> |       | Total TON <sup>[c]</sup> | $Y_s$ [%] <sup>[d]</sup> | $Y_o$ [%] <sup>[e]</sup> | OCE [%] <sup>[f]</sup> | PhOH [%] <sup>[g]</sup> | $H_2O_2$ (%) remained |
|----------|--------------------|-------|--------------------------|--------------------------|--------------------------|------------------------|-------------------------|-----------------------|
|          | <i>p</i> -BQ       | PhOH  |                          |                          |                          |                        |                         |                       |
| 1 min    | 0.21               | 0.45  | 0.67                     | 0.21                     | 0.35                     | 21.95                  | 68.26                   | 98                    |
| 10 min   | 0.30               | 2.33  | 2.63                     | 0.82                     | 1.37                     | 22.51                  | 88.65                   | 93                    |
| 20 min   | 0.34               | 2.64  | 2.99                     | 0.93                     | 1.56                     | 19.60                  | 88.45                   | 91                    |
| 30 min   | 0.44               | 2.74  | 3.18                     | 0.99                     | 1.66                     | 17.22                  | 86.21                   | 89                    |
| 45 min   | 0.53               | 3.21  | 3.74                     | 1.17                     | 1.95                     | 17.79                  | 85.78                   | 87                    |
| 1        | 0.69               | 9.83  | 10.52                    | 3.28                     | 5.48                     | 41.49                  | 93.45                   | 86                    |
| 2        | 1.09               | 21.39 | 22.48                    | 7.01                     | 11.72                    | 69.31                  | 95.16                   | 82                    |
| 3        | 1.36               | 23.03 | 24.39                    | 7.61                     | 12.72                    | 71.53                  | 94.43                   | 81                    |
| 5        | 1.30               | 25.54 | 26.83                    | 8.37                     | 13.99                    | 63.93                  | 95.17                   | 77                    |
| 10       | 1.26               | 27.23 | 28.49                    | 8.89                     | 14.85                    | 39.65                  | 95.59                   | 61                    |
| 18       | 0.82               | 27.23 | 28.05                    | 8.75                     | 14.62                    | 26.48                  | 97.08                   | 43                    |
| 24       | 0.57               | 27.48 | 28.04                    | 8.75                     | 14.62                    | 24.88                  | 97.97                   | 40                    |
| 48       | 0.37               | 28.36 | 28.73                    | 8.97                     | 14.98                    | 21.39                  | 98.72                   | 29                    |

<sup>[a]</sup>Conditions: Total volume of the reaction solution was 3 mL; Solvent: acetonitrile; Catalyst:  $V_{nr}$  (V content: 0.014 mmol); Substrate: benzene (4.486 mmol); Oxidant: 35%  $H_2O_{2(aq)}$  (2.685 mmol); PCA (0.04 mmol); Temperature: 25 °C. The products were determined using GC analysis with nitrobenzene as the internal standard. <sup>[b]</sup>Turnover number (TON) for each of the oxygenated products, *p*-BQ and PhOH (mmol), respectively, was determined by calculating the number of millimoles of product per millimole of catalyst (based on V content). <sup>[c]</sup>The total TON of the products (*p*-BQ + PhOH). <sup>[d]</sup> $Y_s$  [%]<sub>c</sub> = [substrate (mol)/ $H_2O_2$  (mol)]×100. <sup>[e]</sup> $Y_o$  [%]<sub>c</sub> = [products (mol)/ $H_2O_2$  (mol)]×100. <sup>[f]</sup>Overall catalytic efficiency (OCE) = (2×*p*-BQ + PhOH)[TON]/[ $H_2O_2$  consumed (equiv.)]. <sup>[g]</sup>Selectivity of PhOH = [(PhOH) (mol)/ [*p*-BQ + PhOH] (mol)]×100.

**Table S5.** Oxidation of benzene to *p*-benzoquinone (*p*-BQ) and phenol (PhOH) catalyzed by the recycled vanadium oxide nanorod catalyst ( $V_{nr}$ ).<sup>[a]</sup>

| Catalyst                                    | TON <sup>[b]</sup> |       | Total TON <sup>[c]</sup> | Y <sub>s</sub> [%] <sup>[d]</sup> | Y <sub>O</sub> [%] <sup>[e]</sup> | OCE [%] <sup>[f]</sup> | PhOH [%] <sup>[g]</sup> | H <sub>2</sub> O <sub>2</sub> (%) remained |
|---------------------------------------------|--------------------|-------|--------------------------|-----------------------------------|-----------------------------------|------------------------|-------------------------|--------------------------------------------|
|                                             | <i>p</i> -BQ       | PhOH  |                          |                                   |                                   |                        |                         |                                            |
| $V_{nr}$ (w/o PCA)                          | 1.75               | 11.74 | 13.49                    | 4.21                              | 7.03                              | 12.10                  | 87.03                   | 25                                         |
| $V_{nr}$ + (PCA)                            | 1.30               | 25.54 | 26.83                    | 8.37                              | 13.99                             | 63.93                  | 95.17                   | 77                                         |
| 1 <sup>st</sup> recycled $V_{nr}$ (w/o PCA) | 1.65               | 15.73 | 17.38                    | 5.42                              | 9.06                              | 12.49                  | 90.50                   | 32                                         |
| 1 <sup>st</sup> recycled $V_{nr}$ + (PCA)   | 2.04               | 20.34 | 22.38                    | 6.99                              | 11.67                             | 31.15                  | 90.88                   | 65                                         |
| 2 <sup>nd</sup> recycled $V_{nr}$ (w/o PCA) | 1.89               | 16.85 | 18.74                    | 5.85                              | 9.77                              | 13.42                  | 90.00                   | 37                                         |
| 2 <sup>nd</sup> recycled $V_{nr}$ + (PCA)   | 2.14               | 20.75 | 22.90                    | 7.15                              | 11.94                             | 22.30                  | 92.72                   | 54                                         |
| $V_{nr}$ leaching                           | -                  | 1.75  | 1.75                     | 0.03                              | 0.05                              | 2.32                   | 100                     | 57                                         |

<sup>[a]</sup>Conditions: Total volume of the reaction solution was 3 mL; Solvent: acetonitrile;  $V_{nr}$  (V content: 0.014 mmol), 1<sup>st</sup> recycled  $V_{nr}$  (V content: 0.012 mmol); 2<sup>nd</sup> recycled  $V_{nr}$  (V content: 0.011 mmol), the leached  $V_{nr}$  (V content:  $8.4 \times 10^{-4}$  mmol), Substrate: benzene (4.486 mmol); Oxidant: 35% H<sub>2</sub>O<sub>2(aq)</sub> (2.685 mmol); PCA (0.04 mmol); Temperature: 25 °C; Time: 5 h. The products were determined using GC analysis with nitrobenzene as the internal standard. <sup>[b]</sup>Turnover number (TON) for each of the oxygenated products, *p*-BQ and PhOH (mmol), respectively, was determined by calculating the number of millimoles of product per millimole of catalyst (based on V content). <sup>[c]</sup>The total TON of the products (*p*-BQ + PhOH). <sup>[d]</sup>Y<sub>s</sub> [%]<sub>c</sub> = [substrate (mol)/H<sub>2</sub>O<sub>2</sub> (mol)]×100. <sup>[e]</sup>Y<sub>O</sub> [%]<sub>c</sub> = [products (mol)/H<sub>2</sub>O<sub>2</sub> (mol)]×100. <sup>[f]</sup>Overall catalytic efficiency (OCE) = (2×*p*-BQ + PhOH)[TON]/[H<sub>2</sub>O<sub>2</sub> consumed (equiv.)]. <sup>[g]</sup>Selectivity of PhOH = [(PhOH) (mol)/ [*p*-BQ + PhOH] (mol)]×100.

**Table S6.** Oxidation of toluene to benzaldehyde (**a**), methyl *p*-benzoquinone (**b**) benzyl alcohol (**c**), *o*-cresol (**d**), and *p*-cresol (**e**) catalyzed by the vanadium oxide nanorod catalyst ( $V_{nr}$ ).<sup>[a]</sup>

| Catalyst                                         | TON <sup>[b]</sup> |          |          |          |          | Total TON <sup>[c]</sup> | Y <sub>S</sub> [%] <sup>[d]</sup> | Y <sub>O</sub> [%] <sup>[e]</sup> | OCE [%] <sup>[f]</sup> | <i>sp</i> <sup>2</sup> / <i>sp</i> <sup>3</sup> [%] <sup>[g]</sup> | H <sub>2</sub> O <sub>2</sub> (%) remained |
|--------------------------------------------------|--------------------|----------|----------|----------|----------|--------------------------|-----------------------------------|-----------------------------------|------------------------|--------------------------------------------------------------------|--------------------------------------------|
|                                                  | <b>a</b>           | <b>b</b> | <b>c</b> | <b>d</b> | <b>e</b> |                          |                                   |                                   |                        |                                                                    |                                            |
| $V_{nr}$                                         | 3.33               | 0.74     | 0.36     | 1.01     | 1.13     | 6.57                     | 2.06                              | 3.43                              | 8.06                   | 44/56                                                              | 33                                         |
| $V_{nr}$ (PCA)                                   | 6.9                | 4.6      | 1.64     | 4.02     | 3.41     | 20.57                    | 6.44                              | 10.73                             | 25.05                  | 58/42                                                              | 31                                         |
| $V_{nr}$ (PCA, PPh <sub>3</sub> ) <sup>[h]</sup> | 4.5                | -        | 3.67     | 3.82     | 3.64     | 15.62                    | 4.89                              | 8.14                              | 12.05                  | 48/52                                                              | 13                                         |

<sup>[a]</sup>Conditions: Total volume of the reaction solution was 3 mL; Solvent: acetonitrile;  $V_{nr}$  (V content: 0.014 mmol); Substrate: toluene (4.47 mmol); Oxidant: 35% H<sub>2</sub>O<sub>2(aq)</sub> (2.685 mmol); PCA (0.04 mmol); Temperature: 25 °C; Time: 5 h. The products were determined using GC analysis with nitrobenzene as the internal standard. <sup>[b]</sup>Turnover number (TON) for each of the oxygenated products, **a–e** (mmol), respectively, was determined by calculating the number of millimoles of product per millimole of catalyst (based on V content). <sup>[c]</sup>The total TON of the products (**a+b+c+d+e**). <sup>[d]</sup>Y<sub>S</sub> [%]<sub>c</sub> = [substrate (mol)/H<sub>2</sub>O<sub>2</sub> (mol)]×100. <sup>[e]</sup>Y<sub>O</sub> [%]<sub>c</sub> = [products (mol)/H<sub>2</sub>O<sub>2</sub> (mol)]×100. <sup>[f]</sup>Overall catalytic efficiency (OCE) = (2×**a**+2×**b**+**c**+**d**+**e**)[TON]/ [H<sub>2</sub>O<sub>2</sub> consumed (equiv.)]. <sup>[g]</sup>Selectivity for products, *o*-, *p*-cresols and methyl *p*-BQ = [(**c**+**d**+**e**)(mol)/all oxidation products (mol)]×100. <sup>[h]</sup>PPh<sub>3</sub> was added after 5 h of reaction time and continued stirring for additional 30 min.

**Table S7.** The XPS characterization of vanadium oxide catalysts.

| Samples                                   | XPS   |                                  |
|-------------------------------------------|-------|----------------------------------|
|                                           | V/O   | V <sup>4+</sup> /V <sup>5+</sup> |
| $V_{nr}$                                  | 0.037 | 0.301                            |
| $V_{nr(cal)}$                             | 0.274 | 0.218                            |
| 1 <sup>st</sup> recycled $V_{nr}$ + (PCA) | 0.222 | 0.639                            |
| V <sub>2</sub> O <sub>5</sub> commercial  | 0.364 | 0.118                            |

## 2. Figures

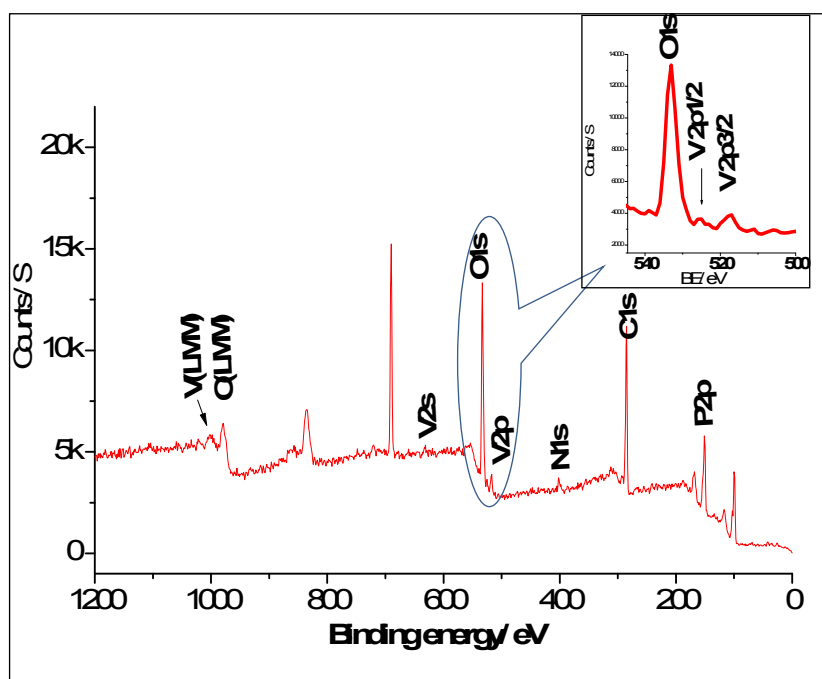

**Fig. S1.** The XPS survey spectrum of vanadium oxide nanorod (V<sub>nr</sub>) catalyst.

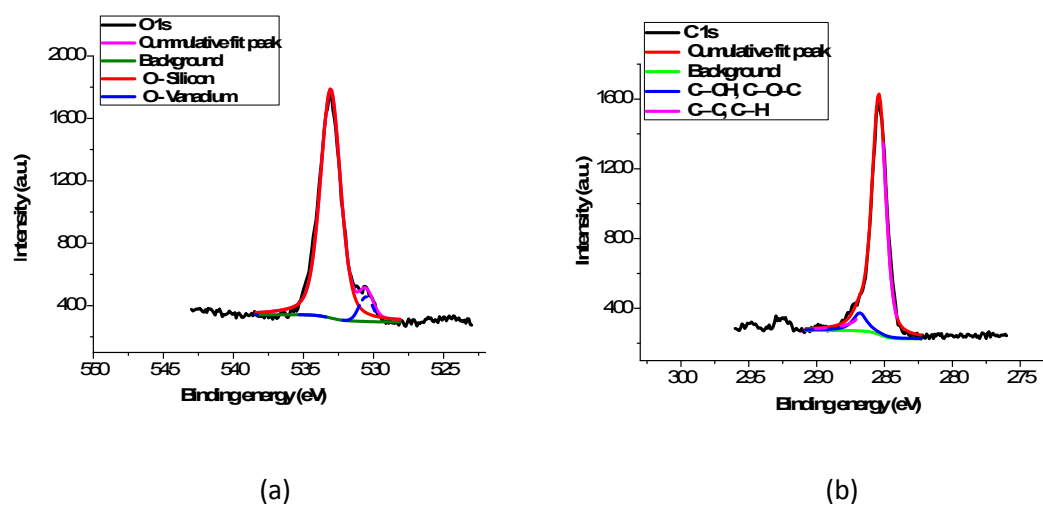

**Fig. S2.** The high-resolution XPS spectra of vanadium oxide nanorod (V<sub>nr</sub>) catalyst de-convoluted presented for: (a) O 1s and (b) C 1s. (Si-O signal contribution is from the Si sample holder)



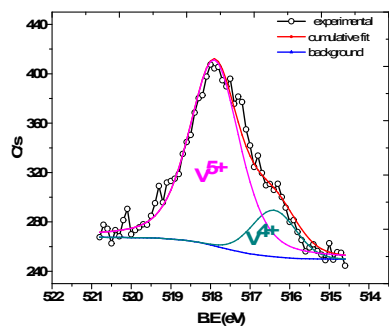

(a)

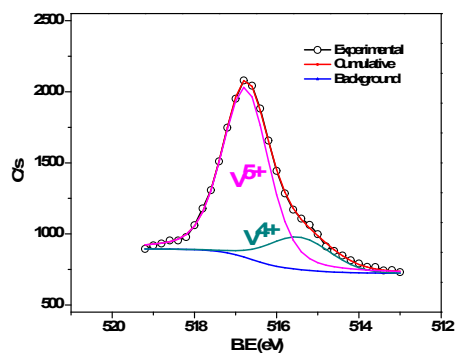

(b)

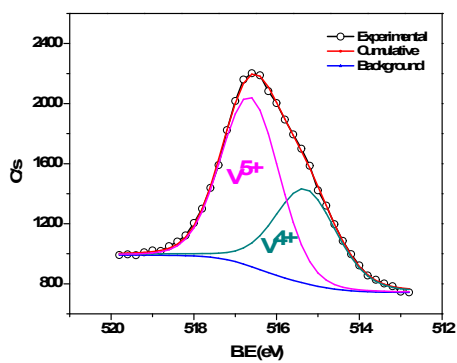

(c)

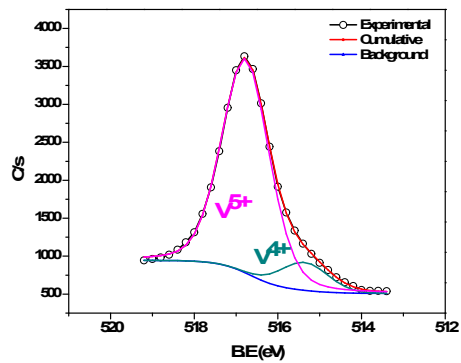

(d)

**Fig. S3.** The high-resolution XPS spectra of vanadium oxide catalysts were deconvoluted presented for V 2p<sub>3/2</sub>. (a) V<sub>nr</sub>; (b) calcined V<sub>nr</sub>; (c) 1<sup>st</sup> recycled V<sub>nr</sub> and (d) V<sub>2</sub>O<sub>5</sub> commercial catalyst.

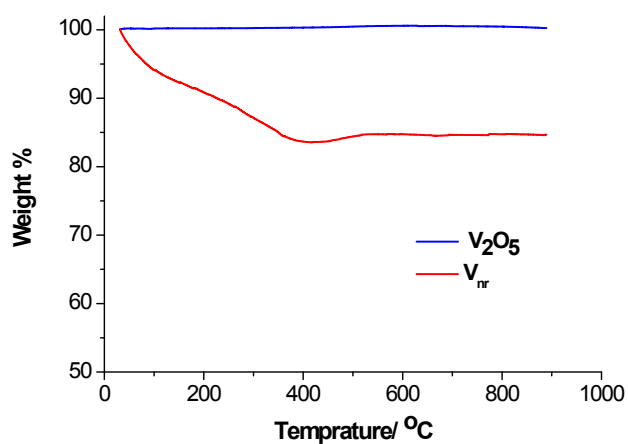

**Fig. S4.** Thermogravimetric analysis (TGA) diagram of vanadium oxide nanorod ( $V_{nr}$ ) catalyst and commercialized bulk  $V_2O_5$  powder.

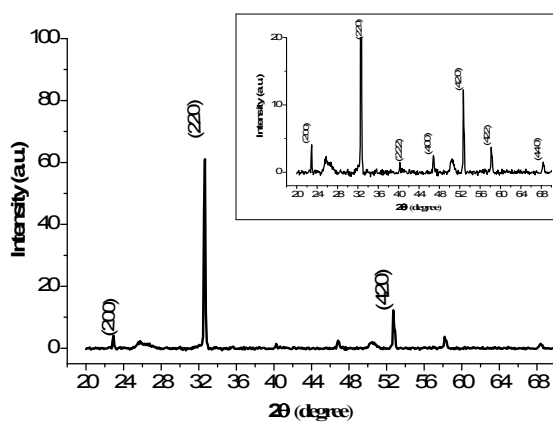

**Fig. S5.** X-ray diffraction (XRD) spectra of vanadium oxide nanorods ( $V_{nr}$ ) catalyst.

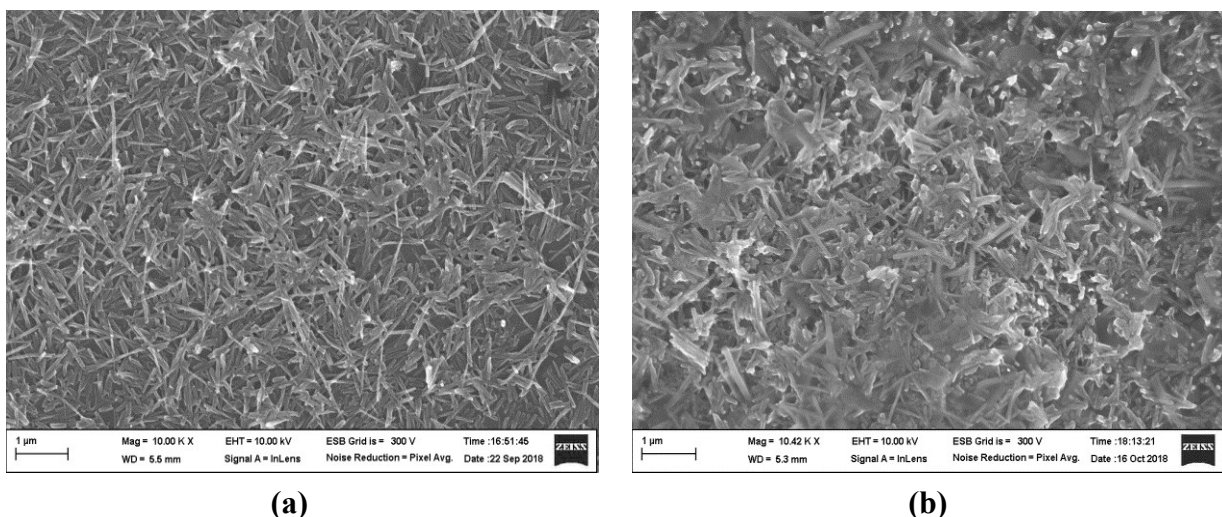

**Fig. S6.** Scanning Electron Microscopy (SEM) image of the vanadium oxide catalyst: (a) the  $V_{nr}$  catalyst; (b) the 1<sup>st</sup> recycled  $V_{nr}$  from  $V_{nr}$  catalyzed reaction mixtures in normal reaction condition with the addition of PCA.

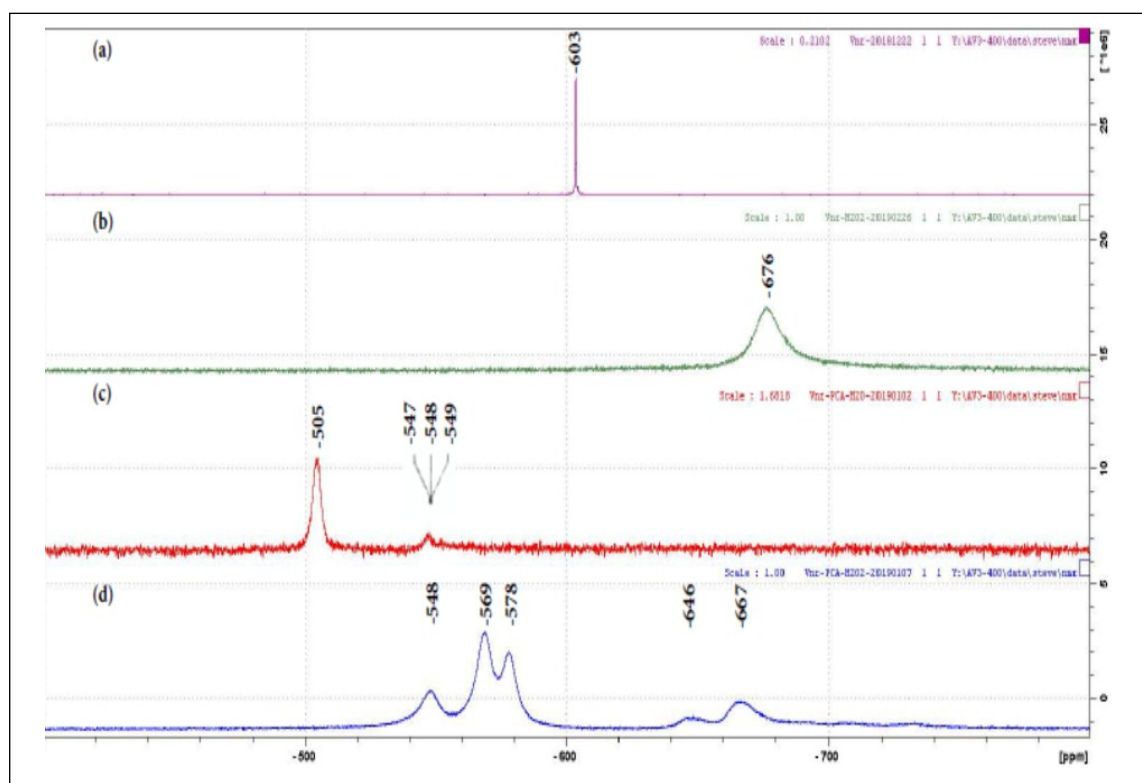

**Fig. S7.**  $^{51}\text{V}$  NMR spectra of solutions of vanadium oxide nanorod in ethanol- $d_1$ . (a)  $V_{nr}$  (V content: 0.014 mmol) (b)  $V_{nr}$  (V content: 0.014 mmol) + 35%  $\text{H}_2\text{O}_2$  (2.685 mmol); (c)  $V_{nr}$  (V content: 0.014 mmol) + PCA (0.04 mmol); (d)  $V_{nr}$  (V content: 0.014 mmol) + PCA (0.04 mmol) + 35%  $\text{H}_2\text{O}_2$  (2.685 mmol).

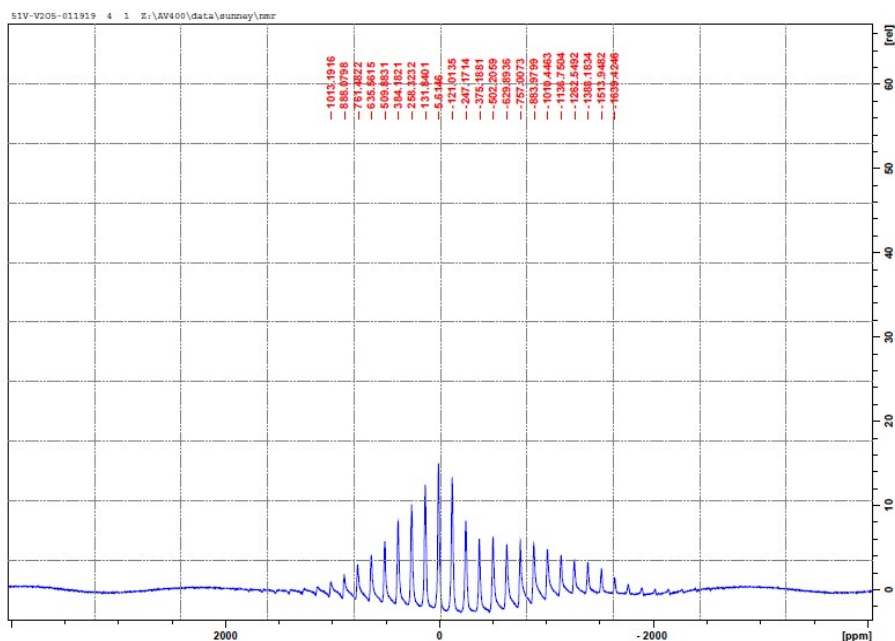

Fig. S8.  $^{51}\text{V}$ -MAS-NMR experimental spectra of vanadium oxide nanorod ( $V_{nr}$ ) catalyst.

### 3. Mechanistic study of catalytic oxidation of benzene to phenol using $^{18}\text{O}_2$ or $\text{H}_2^{18}\text{O}_2$ .

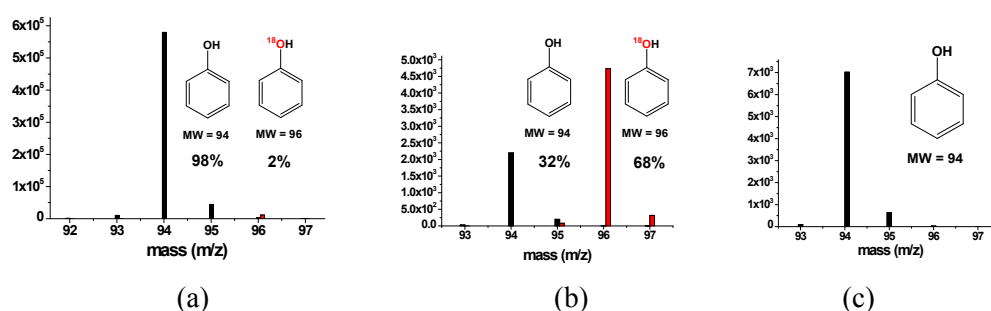

Fig. S9. The oxygen-isotopic distribution of PhOH under the reaction mixtures of vanadium catalyst,  $V_{nr}$  containing (a) 35%  $\text{H}_2^{16}\text{O}_{2(\text{aq})}$  enriched at 1 atm of  $^{18}\text{O}_2$  and (b) 35%  $\text{H}_2^{18}\text{O}_2$  in  $\text{H}_2\text{O}$  at 1 atm  $\text{N}_2$  in  $\text{CH}_3\text{CN}$ . The reactions were proceeded for 3 h. The ratios of PhOH: $^{18}\text{O}$ -PhOH derived from the deconvolution of the mass spec of  $^{16}\text{O}$  enriched PhOH were 98:2 and 32:68, respectively; the mass spec of the parent  $^{16}\text{O}$ -enriched PhOH is represented in (c).

#### 4. Determination of NIH-shift ratios of 4-[<sup>2</sup>H<sub>0,1</sub>]toluene catalyzed by vanadium oxide catalyst in CH<sub>3</sub>CN by the addition of H<sub>2</sub>O<sub>2(aq)</sub> using GC-MS

##### Synthesis of 4-[<sup>2</sup>H<sub>0,1</sub>]toluenes:

4-[<sup>2</sup>H<sub>0,1</sub>]toluenes were synthesized by carrying out a hydrolysis of (4-methylphenyl)magnesium bromide, which was prepared by the reaction of 4-bromotoluene with magnesium in anhydrous tetrahydrofuran and with D<sub>2</sub>O according to the reported procedure.<sup>1</sup>

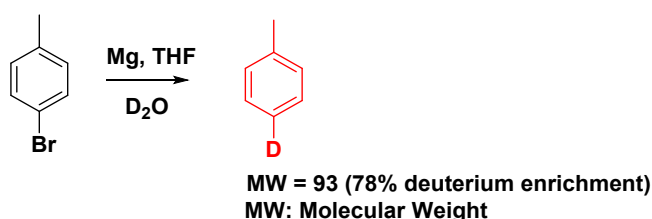

**Scheme S1.** Preparation of 4-[<sup>2</sup>H<sub>0,1</sub>]toluenes.

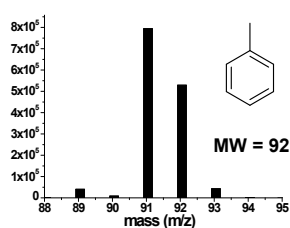

**Fig. S10 (a)** toluene

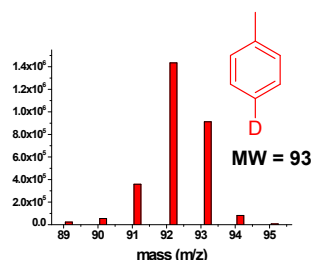

**Fig. S10 (b)** 4-[<sup>2</sup>H<sub>0,1</sub>]toluene

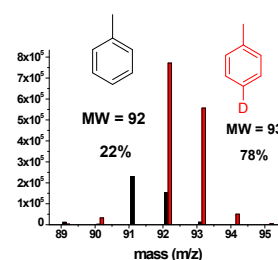

**Fig. S10 (c)**  
toluene:4-[<sup>2</sup>H<sub>1</sub>]toluene = 22%:78%

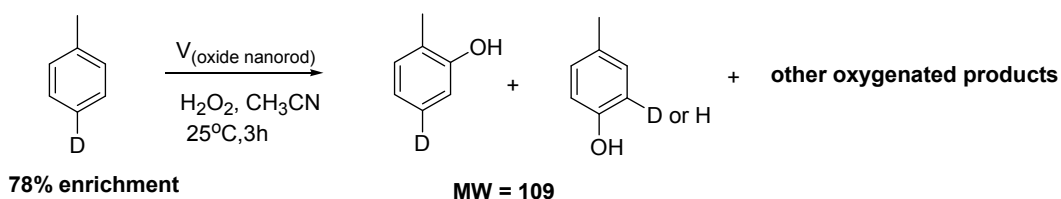

**Scheme S2.** Total volume of the reaction solution was 3 mL; Solvent: acetonitrile; Catalyst: Vanadium oxide nanorod (V content: 0.014 mmol); Substrate: 4-[<sup>2</sup>H<sub>0,1</sub>]toluenes (with a deuterium enrichment of 78%) (4.47 mmol); Oxidant: 35% H<sub>2</sub>O<sub>2(aq)</sub> (2.685 mmol); Reaction time: 3 h; Temperature: 25°C.

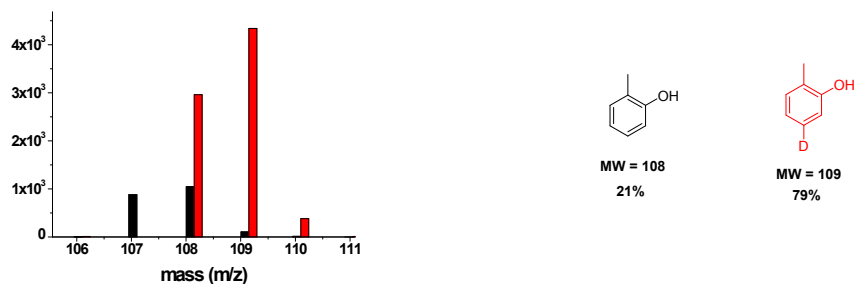

**Fig. S11.** The mass spectra of the oxygenated product, 4-[<sup>2</sup>H<sub>0,1</sub>]-*o*-cresols.

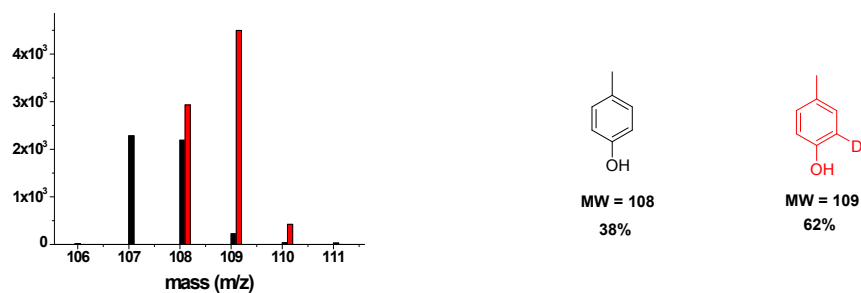

**Fig. S12.** The mass spectra of the oxygenated product, 3-[<sup>2</sup>H<sub>0,1</sub>]-*p*-cresol. (Deuterium enrichment (78%) for the reactant, 4-[<sup>2</sup>H<sub>0,1</sub>]-toluenes).

**NIH-shift ratio of the deuterium (62%) remaining in the oxidation product 3-[<sup>2</sup>H<sub>0,1</sub>]-*p*-cresols of 4-[<sup>2</sup>H<sub>0,1</sub>]-toluenes (78% deuterium enrichment) = 62%/78% = 80%**

## Reference

- 1 Y. Morimoto, S. Bunno, N. Fujieda, H. Sugimoto and S. Itoh, *J. Am. Chem. Soc.*, 2015, **137**, 5867-5870.
